# Supplementary material for: The positive prognostic effect of stromal CD8+ tumor-infiltrating T cells is restrained by the expression of HLA-E in non-small cell lung carcinoma
Source: PubMed Central journal article supplement (PMC4823121; doi:10.18632/oncotarget.6506), 2015-12-02
Supplement: oncotarget-07-3477-s001.pdf [file oncotarget-07-3477-s001.pdf]

## SUPPLEMENTARY FIGURES AND TABLE

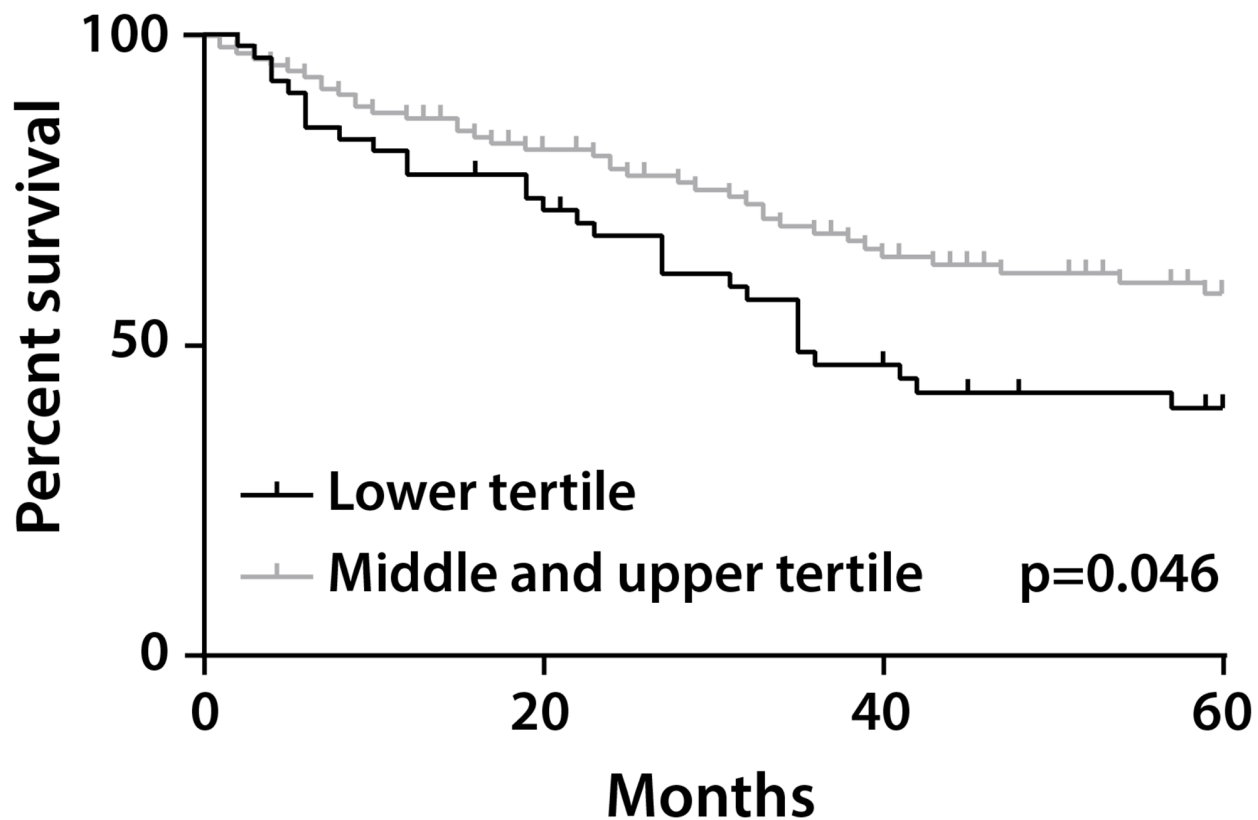

**Supplementary Figure S1: Tertile based grouping of stromal CD8+ T cells and influence on OS.** The patients were grouped based on the CD8+ T cell counts/mm<sup>2</sup> tumor. Patients with CD8 T cell counts belonging to the lower tertile were categorized as low (n = 54) whereas patients with counts in the middle and upper tertile were categorized as high (n = 109). Kaplan-Meier curves were used to estimate OS whereas the log-rank test was used to compare the differences between the two curves (p = 0.046).

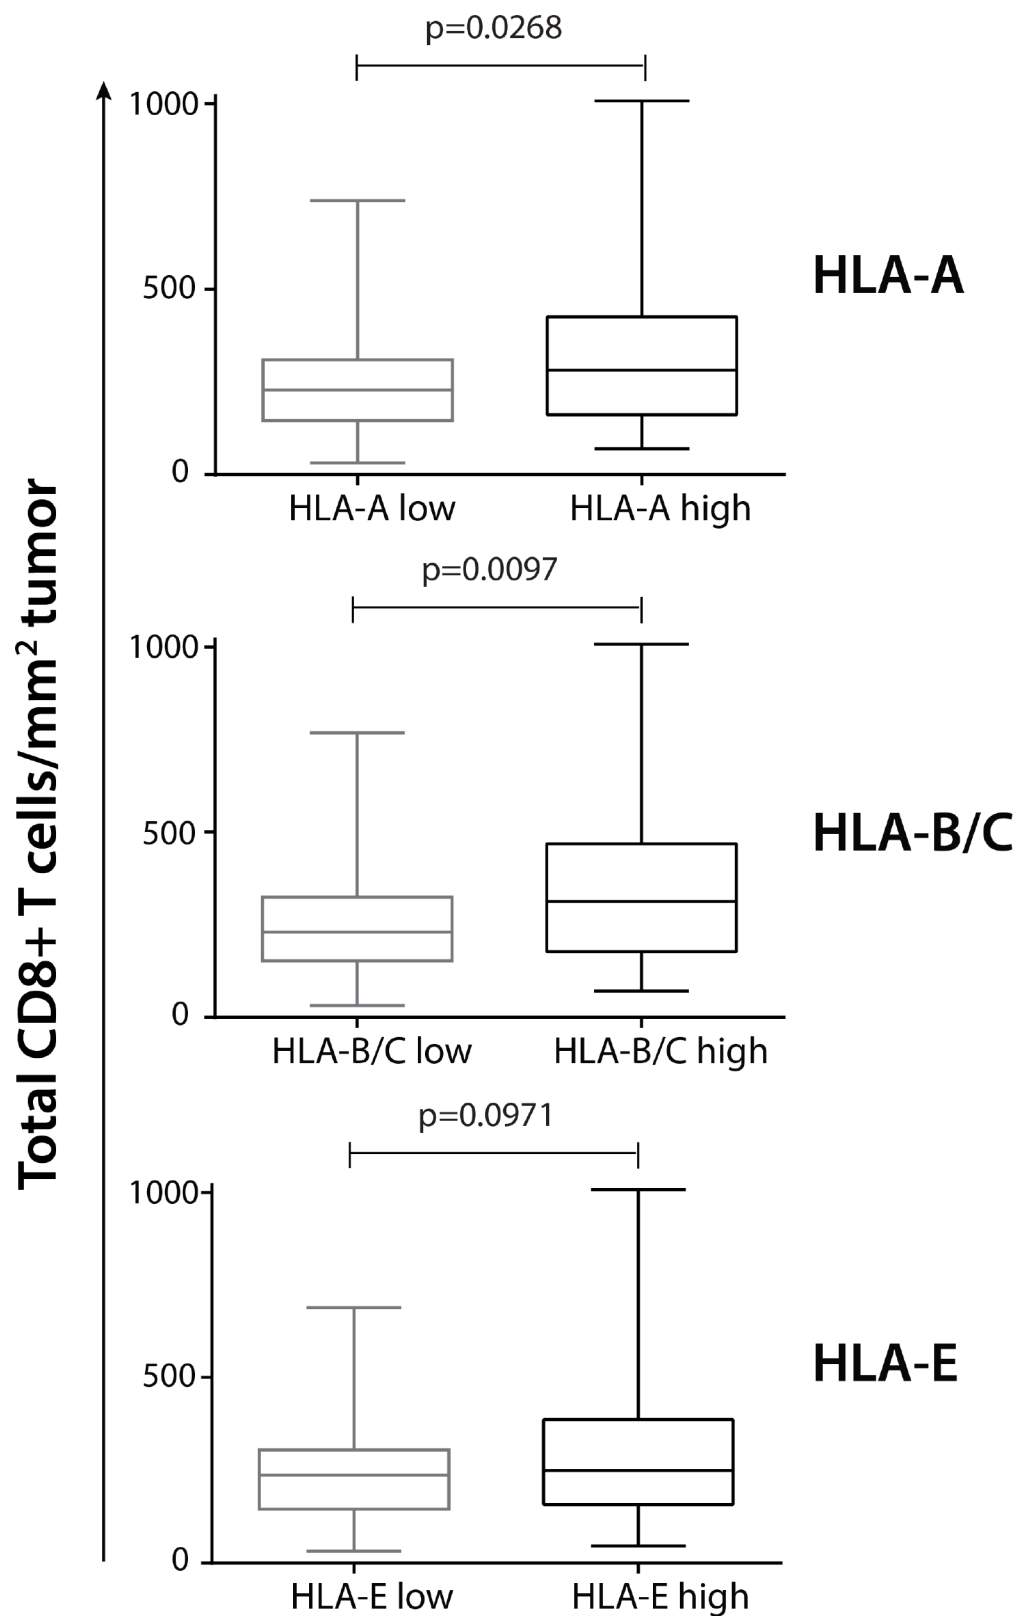

**Supplementary Figure S2: HLA expression and its relation with total CD8+ T cell infiltration in the primary tumor.** The association between the total CD8+ T cell count per mm<sup>2</sup> tumor and expression of HLA-A (low vs high, n = 106 vs n = 91), HLA-B/C (low vs high, n = 156 vs n = 41) and HLA-E (low vs high, n = 87 vs n = 110) was assessed. Tumors expressing classical HLA are infiltrated with higher numbers of CD8+ T cells (Mann-Whitney *U* test,  $p < 0.05$ ).

Supplementary Table S1: Relationship of tumor characteristics with HLA expression and CD8+ T cell expression in pulmonary adenocarcinoma

|                | HLA-A |     | P value       | HLA-B/C |     | P value       | HLA-E |     | P value |
|----------------|-------|-----|---------------|---------|-----|---------------|-------|-----|---------|
|                | High  | Low |               | High    | Low |               | High  | Low |         |
| Stage          |       |     |               |         |     |               |       |     |         |
| I              | 36    | 26  | 0.621         | 17      | 45  | 0.872         | 44    | 18  | 0.777   |
| II             | 43    | 31  |               | 16      | 58  |               | 56    | 18  |         |
| III            | 16    | 19  |               | 9       | 26  |               | 25    | 10  |         |
| IV             | 15    | 11  |               | 7       | 19  |               | 17    | 9   |         |
| β2-M           |       |     |               |         |     |               |       |     |         |
| Low            | 18    | 29  | <b>0.007</b>  | 8       | 39  | 0.179         | 32    | 15  | 0.576   |
| High           | 92    | 58  |               | 41      | 109 |               | 110   | 40  |         |
| HLA-A          |       |     |               |         |     |               |       |     |         |
| Low            |       |     |               | 6       | 81  | <b>0.0001</b> | 60    | 27  | 0.426   |
| High           |       |     |               | 43      | 67  |               | 82    | 28  |         |
| HLA-B/C        |       |     |               |         |     |               |       |     |         |
| Low            |       |     |               |         |     |               | 106   | 42  | 0.856   |
| High           |       |     |               |         |     |               | 36    | 13  |         |
| Total CD8+     |       |     |               |         |     |               |       |     |         |
| Low            | 41    | 55  | <b>0.012*</b> | 16*     | 80  | <b>0.018*</b> | 64    | 32  | 0.480*  |
| High           | 45    | 23  |               | 25      | 43  |               | 53    | 15  |         |
| CD8+ in stroma |       |     |               |         |     |               |       |     |         |
| Low            | 45    | 47  | 0.819*        | 19      | 73  | 0.444*        | 66    | 26  | 0.990*  |
| High           | 41    | 30  |               | 22      | 49  |               | 51    | 20  |         |
| CD8+ in tumor  |       |     |               |         |     |               |       |     |         |
| Low            | 50    | 54  | 0.426*        | 21      | 83  | 0.186*        | 68    | 36  | 0.057*  |
| High           | 36    | 23  |               | 20      | 39  |               | 49    | 10  |         |

Significant results ( $p < 0.050$ ) are indicated in bold.

\*Bonferroni corrected p value
